# Supplementary material for: Perceptions and experiences of individuals at-risk of rheumatoid arthritis (RA) knowing about their risk of developing RA and being offered preventive treatment: systematic review and thematic synthesis of qualitative studies
Source: PubMed Central journal article supplement (PMC8762008; doi:10.1136/annrheumdis-2021-221160), 2021-11-08
Supplement: annrheumdis-2021-221160supp001.pdf [file annrheumdis-2021-221160supp001.pdf]

*Supplementary table. GRADE-CERQual component definitions.*

| <b>GRADE-CERQual component</b> | <b>Definition</b>                                                                                                                                        |
|--------------------------------|----------------------------------------------------------------------------------------------------------------------------------------------------------|
| Methodological limitations     | The extent to which there are concerns about the design or conduct of the primary studies that contributed evidence to an individual review finding.     |
| Coherence                      | An assessment of how clear and cogent the fit is between the data from the primary studies and a review finding that synthesises the data.               |
| Adequacy                       | An overall determination of the degree of richness and the quantity of data supporting a review finding.                                                 |
| Relevance                      | The extent to which the body of data from the primary studies supporting a review finding is applicable to the context specified in the review question. |
