# Supplementary material for: Perceptions and experiences of individuals at-risk of rheumatoid arthritis (RA) knowing about their risk of developing RA and being offered preventive treatment: systematic review and thematic synthesis of qualitative studies
Source: PubMed Central journal article supplement (PMC8762008; doi:10.1136/annrheumdis-2021-221160), 2021-11-08
Supplement: annrheumdis-2021-221160supp002.pdf [file annrheumdis-2021-221160supp002.pdf]

*Supplementary table. GRADE-CERQUAL confidence rating definitions.*

| <b>GRADE-CERQual confidence rating</b> | <b>Definition</b>                                                                                   |
|----------------------------------------|-----------------------------------------------------------------------------------------------------|
| High                                   | Highly likely that the review finding is a reasonable representation of the phenomenon of interest. |
| Moderate                               | Likely that the review finding is a reasonable representation of the phenomenon of interest.        |
| Low                                    | Possible that the review finding is a reasonable representation of the phenomenon of interest.      |
| Very low                               | Unclear whether the review finding is a reasonable representation of the phenomenon of interest     |
