# Supplementary material for: Perceptions and experiences of individuals at-risk of rheumatoid arthritis (RA) knowing about their risk of developing RA and being offered preventive treatment: systematic review and thematic synthesis of qualitative studies
Source: PubMed Central journal article supplement (PMC8762008; doi:10.1136/annrheumdis-2021-221160), 2021-11-08
Supplement: annrheumdis-2021-221160supp004.pdf [file annrheumdis-2021-221160supp004.pdf]

*Supplementary material. Search strategy.*

1. "rheumatoid arthritis" OR "rheumatoid nodulosis" OR "caplan's syndrome" OR "still's disease" OR "inflammatory arthritis" OR "felty syndrome" OR RA OR "rheumatoid vasculitis").ti,ab
2. "ARTHRITIS, RHEUMATOID"/
3. (1 OR 2)
4. (risk OR "risk factors" OR "relative risk").ti,ab
5. RISK/ OR "RISK FACTORS"/ OR "RELATIVE RISK"/
6. (4 OR 5)
7. ("patient adherence" OR "patient information" OR "patient compliance" OR "patient education").ti,ab
8. "PATIENT COMPLIANCE"/ OR "PATIENT ACCEPTANCE OF HEALTH CARE"/
9. "PATIENT EDUCATION AS TOPIC"/ OR "PATIENT EDUCATION"/
10. "PATIENT INFORMATION"/
11. (7 OR 8 OR 9 OR 10)
12. "PREVENTIVE MEDICINE"/
13. (prevent\* OR "preventative medicine").ti,ab
14. (11 OR 12)
15. (3 AND 6 AND 11 AND 14)
